# Supplementary material for: A methodological approach to correlate tumor heterogeneity with drug distribution profile in mass spectrometry imaging data
Source: PubMed Central journal article supplement (PMC7688471; doi:10.1093/gigascience/giaa131), 2020-11-25
Supplement: giaa131_response_to_reviewer_comments_revision_1.pdf [file giaa131_response_to_reviewer_comments_revision_1.pdf]

## Author's Response To Reviewer Comments

Close

Dear editor,  
Herewith the revised manuscript. We have taken care of all comments and revisions/additions as requested in the manuscript, modified and checked ref.49 and we have registered the software, as requested, and included the identifiers in the manuscript.

Kind regards,  
Geert Postma

Close
